# Supplementary material for: Lithium Demand and Mitigation Pathways from China’s Photovoltaic Storage Expansion under Climate Targets
Source: Research Square preprint supplement (doi:10.21203/rs.3.rs-8033680/v1), 2025-12-25
Supplement: Supplementary file 1 [file fb89a60785c7d31f8399a829.xlsx]

## Sheet: Fig1
2020						2025
Energy Storage Type	Percentage					Energy Storage Type	Percentage
Pumped Hydro Storage	0.893					Pumped Hydro Storage	0.374
Lithium-ion Battery	0.082					Lithium-ion Battery	0.599
Others	0.025					Lead-acid Battery	0.003
						Flow Battery	0.007
						Compressed Air Energy Storage	0.005
						Sodium-based Battery	0.001
						Others	0.011

## Sheet: Fig3ab
1.5℃	rooftop_pv	biomass	coal	gas	geothermal	hydro	nuclear	refined liquids	solar	wind
2020	53428.6	73936.1	4.84108e+06	160172	39052.2	1.11475e+06	290288	6966.06	141810	273743
2025	348314	173162	3914815	145189	132634	1.11475e+06	770743	9976.11	874145	925666
2030	557889	392154	1.59436e+06	183124	235959	1.11475e+06	1.86201e+06	16167.4	1.82638e+06	2.1927e+06
2035	970336	520896	813750	194206	257297	1.11475e+06	2.61545e+06	11977.5	2.52821e+06	3.0559e+06
2040	1.29231e+06	632147	676672	197728	259395	1.11475e+06	3.14255e+06	8807.82	3.15137e+06	3.70525e+06
2045	1.46569e+06	714283	525389	201415	255581	1.11475e+06	3.56704e+06	6778.66	3.76374e+06	4.12008e+06
2050	1.55541e+06	768976	358054	197197	240250	1.11475e+06	3.82678e+06	5363.49	4.18162e+06	4.43472e+06
2℃
2020	53428.6	73936.1	4.84108e+06	160172	39052.2	1.11475e+06	290288	6966.06	141810	273743
2025	405328	115843	5.01635e+06	151146	90168.3	1.11475e+06	502447	6361.14	611112	611002
2030	552147	198005	4.48566e+06	162302	152051	1.11475e+06	912483	7878.2	1.34046e+06	1.38669e+06
2035	908544	293713	3.49301e+06	168892	197047	1.11475e+06	1.39112e+06	8654.18	1.93877e+06	2.23617e+06
2040	1.29699e+06	341980	2656255	171450	220101	1.11475e+06	1.82717e+06	7845.03	2.49032e+06	2.93115e+06
2045	1.56595e+06	329155	1.69704e+06	180190	233181	1.11475e+06	2.2983e+06	7353.83	3.1637e+06	3.47423e+06
2050	1.72316e+06	287954	958250	174420	225046	1.11475e+06	2.62304e+06	5844.89	3.68348e+06	3.89775e+06

## Sheet: Fig3c
Shandong	0.1	0.4
Shanxi	0.1	0.15
Inner Mongolia	0.15	0.3
Ningxia	0.1	0.1
Shaanxi	0.1	0.2
Gansu	0.05	0.2
Qinghai	0.1	0.1
Xinjiang	0.25	0.25
Tibet	0.2	0.2
Liaoning	0.15	0.15
Hebei	0.1	0.15
Tianjin	0.1	0.1
Anhui	0.05	0.05
Shanghai	0	0
Zhejiang	0.1	0.2
Jiangsu	0.08	0.1
Fujian	0.1	0.1
Henan	0.1	0.55
Hubei	0.1	0.1
Hunan	0.05	0.05
Jiangxi	0.1	0.1
Guangdong	0.1	0.1
Guangxi	0.1	0.15
Yunnan	0	0
Guizhou	0.1	0.1
Hainan	0.25	0.25

## Sheet: Fig3d
EJ	1990	2005	2010	2015	2020	2025	2030	2035	2040	2045	2050	2055	2060	2065	2070	2075	2080	2085	2090	2095	2100
1.5	7.2e-06	0.00031	0.00253188	0.161227	0.510518	3.14692	6.57497	9.10156	11.3449	13.5494	15.0538	15.761	16.7087	17.0379	16.672	15.8058	15.2566	14.7184	14.7233	14.4507	13.8732
2	7.2e-06	0.00031	0.00253188	0.161227	0.510518	2.1998	4.82566	6.97958	8.96556	11.3859	13.2603	14.2345	14.8759	15.5184	15.5336	14.7965	13.9449	12.9043	11.8469	10.9787	10.2937
1.5 - EH	3.96e-06	0.0001705	0.00139253	0.0886749	0.280785	1.73081	3.61623	5.00586	6.23971	7.4522	8.2796	8.66857	9.18978	9.37087	9.16962	8.69319	8.39115	8.09513	8.0978	7.94789	7.63023												1.5	2	1.5-最高	1.5-高（平均）	1.5-低（平均）	1.5-BAU	2.0-最高	2.0-高（平均）	2.0-低（平均）	2.0-BAU
1.5 - AH	1.38024e-06	5.9427e-05	0.000485361	0.0309072	0.0978662	0.603265	1.26042	1.74477	2.17482	2.59743	2.88582	3.02139	3.20306	3.26618	3.19603	3.02997	2.9247	2.82152	2.82245	2.7702	2.65948											1990	7.2e-06	7.2e-06	3.96e-06	1.38024e-06	1.05696e-06	7.2e-07	3.96e-06	1.38024e-06	1.05696e-06	7.2e-07
1.5 - LH	1.05696e-06	4.5508e-05	0.00037168	0.0236681	0.074944	0.461968	0.965206	1.33611	1.66543	1.98906	2.2099	2.31372	2.45284	2.50117	2.44746	2.32029	2.23967	2.16066	2.16138	2.12136	2.03658											2005	0.00031	0.00031	0.0001705	5.9427e-05	4.5508e-05	3.1e-05	0.0001705	5.9427e-05	4.5508e-05	3.1e-05
1.5-BAU	7.2e-07	3.1e-05	0.000253188	0.0161227	0.0510518	0.314692	0.657497	0.910156	1.13449	1.35494	1.50538	1.5761	1.67087	1.70379	1.6672	1.58058	1.52566	1.47184	1.47233	1.44507	1.38732											2010	0.00253188	0.00253188	0.00139253	0.000485361	0.00037168	0.000253188	0.00139253	0.000485361	0.00037168	0.000253188
2.0 - EH	3.96e-06	0.0001705	0.00139253	0.0886749	0.280785	1.20989	2.65411	3.83877	4.93106	6.26226	7.29319	7.829	8.18174	8.53512	8.54347	8.1381	7.66969	7.09736	6.51581	6.03831	5.66155											2015	0.161227	0.161227	0.0886749	0.0309072	0.0236681	0.0161227	0.0886749	0.0309072	0.0236681	0.0161227
2.0 - AH	1.38024e-06	5.9427e-05	0.000485361	0.0309072	0.0978662	0.421703	0.925078	1.33799	1.7187	2.18268	2.54201	2.72876	2.85171	2.97488	2.97779	2.8365	2.67323	2.47375	2.27105	2.10462	1.97331											2020	0.510518	0.510518	0.280785	0.0978662	0.074944	0.0510518	0.280785	0.0978662	0.074944	0.0510518
2.0 - AL	1.05696e-06	4.5508e-05	0.00037168	0.0236681	0.074944	0.322931	0.708406	1.0246	1.31614	1.67145	1.94662	2.08963	2.18378	2.2781	2.28033	2.17213	2.04711	1.89435	1.73913	1.61168	1.51112											2025	3.14692	2.1998	1.73081	0.603265	0.461968	0.314692	1.20989	0.421703	0.322931	0.21998
2.0-BAU	7.2e-07	3.1e-05	0.000253188	0.0161227	0.0510518	0.21998	0.482566	0.697958	0.896556	1.13859	1.32603	1.42345	1.48759	1.55184	1.55336	1.47965	1.39449	1.29043	1.18469	1.09787	1.02937											2030	6.57497	4.82566	3.61623	1.26042	0.965206	0.657497	2.65411	0.925078	0.708406	0.482566
																																2035	9.10156	6.97958	5.00586	1.74477	1.33611	0.910156	3.83877	1.33799	1.0246	0.697958
																																2040	11.3449	8.96556	6.23971	2.17482	1.66543	1.13449	4.93106	1.7187	1.31614	0.896556
																																2045	13.5494	11.3859	7.4522	2.59743	1.98906	1.35494	6.26226	2.18268	1.67145	1.13859
																																2050	15.0538	13.2603	8.2796	2.88582	2.2099	1.50538	7.29319	2.54201	1.94662	1.32603
																																			0	0	0	0	0	0	0	0
																																			0	0	0	0	0	0	0	0
																																			0	0	0	0	0	0	0	0
																																			0	0	0	0	0	0	0	0
																																			0	0	0	0	0	0	0	0
																																			0	0	0	0	0	0	0	0
																																			0	0	0	0	0	0	0	0
																																			0	0	0	0	0	0	0	0
																																			0	0	0	0	0	0	0	0
																																			0	0	0	0	0	0	0	0
							1.5	2
						2020	0.510518	0.510518
						2025	3.14692	2.1998
						2030	6.57497	4.82566
						2035	9.10156	6.97958
						2040	11.3449	8.96556
						2045	13.5494	11.3859
						2050	15.0538	13.2603
GWh	1.5 - EH	1.5 - AH	1.5 - LH	1.5-BAU	2.0 - EH	2.0 - AH	2.0 - AL	2.0-BAU			GWh	2020	2025	2030	2035	2040	2045	2050
2020	77995.7	27185.1	20818.1	14181	77995.7	27185.1	20818.1	14181			1.5 - EH	77995.7	480724	1.00451e+06	1.39052e+06	1.73325e+06	2.07061e+06	2.29045e+06
2025	480724	167596	128325	87414.5	336073	117143	89709.2	61111.2			1.5 - AH	27185.1	167596	350095	484614	604045	721480	791561
2030	1.00451e+06	350095	268113	182638	737253	257911	196724	134046			1.5 - LH	20818.1	128325	268113	371197	462621	552657	613084
2035	1.39052e+06	484614	371197	252821	1.06688e+06	371663	284601	193877			1.5-BAU	14181	87414.5	182638	252821	315137	376374	418162
2040	1.73325e+06	604045	462621	315137	1.37252e+06	478451	366939	249032			2.0 - EH	77995.7	336073	737253	1.06688e+06	1.37252e+06	1.74118e+06	2.027e+06
2045	2.07061e+06	721480	552657	376374	1.74118e+06	606323	464569	316370			2.0 - AH	27185.1	117143	257911	371663	478451	606323	706113
2050	2.29045e+06	791561	613084	418162	2.027e+06	706113	540727	368348			2.0 - AL	20818.1	89709.2	196724	284601	366939	464569	540727
											2.0-BAU	14181	61111.2	134046	193877	249032	316370	368348

## Sheet: Fig4-BAU1.5
2020	2025	2030	2035	2040	2045	2050
0.0510518	0.314692	0.657497	0.910156	1.13449	1.35494	1.50538
alpha	1	2	3
2020	0.769	0.015	0.216
2025	0.7063	0.1096	0.1842
2030	0.526	0.3369	0.1371
2035	0.4199	0.4656	0.1145
2040	0.3429	0.4756	0.1815
2045	0.281	0.5215	0.1975
2050	0.2443	0.5322	0.2235
phi	1	2	3
	0.7690 0.0150 0.2160
	0.4683 0.4683 0.0634							0.216	0.1842	0.1371	0.1145	0.1815	0.1975	0.2235
	0 1.0000 0
	0 0.9750 0.0250
	0 0.5201 0.4799
	0 0.7298 0.2702
	0 0.6033 0.3967
0.0511	0.2636	0.3428	0.2527	0.2243	0.2205	0.1504

## Sheet: Fig4-AL1.5
2020	2025	2030	2035	2040	2045	2050
0.074944	0.461968	0.965206	1.33611	1.66543	1.98906	2.2099
alpha	1	2	3
	0.769	0.015	0.216
	0.6902	0.1466	0.1633
	0.4591	0.4323	0.1086
	0.3349	0.5771	0.088
	0.2519	0.5671	0.181
	0.1903	0.5674	0.2422
	0.1559	0.5871	0.257
phi	1	2	3
	0.7690 0.0150 0.2160
	0.4865 0.4865 0.0271
	0 1.0000 0
	0 0.9677 0.0323
	0 0.5366 0.4634
	0 0.5686 0.4314
	0 0.6759 0.3241
0.0749	0.387	0.5032	0.3709	0.3293	0.3236	0.2208

## Sheet: Fig4-AH1.5
2020	2025	2030	2035	2040	2045	2050
0.0978662	0.603265	1.26042	1.74477	2.17482	2.59743	2.88582
alpha	1	2	3
	0.769	0.015	0.216
	0.667	0.1662	0.1668
	0.4025	0.3015	0.296
	0.2712	0.387	0.3419
	0.1896	0.4576	0.3528
	0.1333	0.5335	0.3332
	0.1035	0.6219	0.2746
phi	1	2	3
	0.7690 0.0150 0.2160
	0.4653 0.4653 0.0694
	0 0.5074 0.4926
	0 0.5635 0.4365
	0 0.6219 0.3781
	0 0.7132 0.2868
	0 0.9284 0.0716
0.0979	0.5054	0.6572	0.4843	0.4301	0.4226	0.2884

## Sheet: Fig4-EH1.5
2020	2025	2030	2035	2040	2045	2050
0.280785	1.73081	3.61623	5.00586	6.23971	7.4522	8.2796
alpha	1	2	3
	0.769	0.015	0.216
	0.6098	0.302	0.0882
	0.2113	0.6613	0.1273
	0.0884	0.6759	0.2357
	0.0396	0.6462	0.3142
	0.0179	0.5661	0.416
	0.0098	0.6037	0.3865
phi	1	2	3
	0.7690 0.0150 0.2160
	0.5000 0.5000 0
	0 0.8519 0.1481
	0 0.6864 0.3136
	0 0.6221 0.3779
	0 0.5000 0.5000
	0 0.6493 0.3507
0.2808	1.45	1.8854	1.3896	1.2338	1.2125	0.8274

## Sheet: Fig4-BAU2.0
2020	2025	2030	2035	2040	2045	2050
0.0510518	0.21998	0.482566	0.697958	0.896556	1.13859	1.32603
alpha	1	2	3
	0.769	0.015	0.216
	0.7279	0.0828	0.1893
	0.5765	0.183	0.2405
	0.4743	0.2478	0.2779
	0.3957	0.3724	0.2318
	0.3186	0.3973	0.2841
	0.2683	0.4868	0.2449
phi	1	2	3
	0.7690 0.0150 0.2160
	0.4844 0.4844 0.0312
	0 0.5644 0.4356
	0 0.5487 0.4513
	0 1.0000 0
	0 0.5000 0.5000
	0 0.9642 0.0358
0.0511	0.1689	0.2626	0.2154	0.1986	0.242	0.1874

## Sheet: Fig4-AL2.0
2020	2025	2030	2035	2040	2045	2050
0.074944	0.322931	0.708406	1.0246	1.31614	1.67145	1.94662
alpha	1	2	3
	0.769	0.015	0.216
	0.7121	0.1079	0.18
	0.514	0.2439	0.2421
	0.3905	0.3429	0.2666
	0.3023	0.4065	0.2912
	0.2231	0.4481	0.3289
	0.1749	0.4671	0.358
phi	1	2	3
	0.7690 0.0150 0.2160
	0.4825 0.4825 0.0349
	0 0.5967 0.4033
	0 0.6561 0.3439
	0 0.6245 0.3755
	0 0.5651 0.4349
	0 0.5363 0.4637
0.0749	0.248	0.3855	0.3162	0.2915	0.3553	0.2752

[truncated: 8 more sheets: Fig4-AH2.0, Fig4-EH2.0, Fig5, Fig6, Fig6-linegraph, Fig7, ScenarioSetting, Parameters]
